# Supplementary material for: Oxidation states of gallium (infrequentiand commoniii) tunableviamedium-sized C60and small-sized C28fullerenes
Source: Royal Society of Chemistry journal article supplement (doi:10.1039/d0qi00824a), 2020-01-01
Supplement: d0qi00824a1.pdf [file d0qi00824a1.pdf]

*Electronic supplementary information*

*for*

**Oxidation states of infrequent I and common III for  
gallium: tunable via medium-sized C<sub>60</sub> and small-sized  
C<sub>28</sub> fullerenes**

*Yao-Xiao Zhao,<sup>†</sup> Kun Yuan,<sup>§</sup> Meng-Yang Li,<sup>†</sup> Xiang Zhao<sup>\*†</sup>*

*<sup>†</sup>Institute for Chemical Physics&Department of Chemistry&School of Science, State Key Laboratory of Electrical Insulation and Power Equipment, and MOE Key Laboratory for Nonequilibrium Synthesis and Modulation of Condensed Matter, Xi'an Jiaotong University, Xi'an 710049, People's Republic of China*

*<sup>§</sup>Key Laboratory for New Molecule Materials Design and Function of Gansu Universities, Tianshui Normal University, Tianshui 741001, People's Republic of China*

*\*Xiang Zhao. Tel: +86-29-82665671. E-mail: xzhao@mail.xjtu.edu.cn*

## Contents

|        |                                                                                                                                                                                                                                                                   |    |
|--------|-------------------------------------------------------------------------------------------------------------------------------------------------------------------------------------------------------------------------------------------------------------------|----|
| I.     | Relative energy of partial important $C_{60}^{m-}$ ( $m = 1 - 3$ ) isomers on AM1 method in Table S1.....                                                                                                                                                         | 3  |
| II.    | Relative energy and gap of $Ga@C_{60}$ isomers on B3LYP/6-31G*~LanI2dz in Table S2.....                                                                                                                                                                           | 3  |
| III.   | Relative energy of doublet $Ga@C_{60}$ isomers on B3LYP/6-31G*, B3LYP/6-31G*~SDD, PBE0/6-31G*~SDD, and BP86/6-31G*~SDD in Table S3. ....                                                                                                                          | 3  |
| IV.    | Geometry of optimized $Ga@C_{2v}(1809)-C_{60}$ on B3LYP/6-31G*~LanI2dz in Fig. S1...4                                                                                                                                                                             | 4  |
| V.     | Statistical thermodynamic analysis of $Ga@C_{60}$ isomers on B3LYP/6-31G*~LanI2dz in Fig. S2.....                                                                                                                                                                 | 4  |
| VI.    | Schematic electronic structure analysis on $Ga^{m+}@C_{2n}^{m-}$ ( $n = 14, 18, 22, 25, 30,$ and $35; m = 0 - 3$ ) in Fig. S3.....                                                                                                                                | 4  |
| VII.   | Different positions of Ga inside $I_h(1812)-C_{60}$ in Fig. S4.....                                                                                                                                                                                               | 5  |
| VIII.  | The RMSD of $Ga@I_h(1812)-C_{60}$ and F-functionalized $Ga@I_h(1812)-C_{60}$ in Fig. S5.....                                                                                                                                                                      | 6  |
| IX.    | Natural electron populations of Ga atoms for energetically optimal $Ga@C_{2n}$ ( $2n = 28, 36, 44, 50, 60,$ and $70$ ) with their ground states and Al atoms for doublet $Al@C_{2n}$ ( $2n = 28$ and $60$ ) on different theoretical levels in Table S4 – S5..... | 6  |
| X.     | Interplay diagram from $\beta$ orbitals of $C_{60}$ , Ga, and $Ga@I_h(1812)-C_{60}$ in Fig. S6.....                                                                                                                                                               | 7  |
| XI.    | Spin density map for doublet $Ga@I_h(1812)-C_{60}$ on B3LYP/6-31G*~LanI2dz in Fig. S7.....                                                                                                                                                                        | 8  |
| XII.   | The topology result of BCPs for $Ga@I_h(1812)-C_{60}$ , and parameters related to the especial BCP in Fig. S8.....                                                                                                                                                | 8  |
| XIII.  | ELF map between two C atoms closest to Ga and Ga for $Ga@I_h(1812)-C_{60}$ in Fig. S9.....                                                                                                                                                                        | 9  |
| XIV.   | H-functionalized $Ga@I_h(1812)-C_{60}$ with different reaction sites of H on B3LYP/6-31G*~LanI2dz in Fig. S10.....                                                                                                                                                | 9  |
| XV.    | Optimized geometries of $Ga@I_h(1812)-C_{60}$ with different functionalized groups on the same reaction site in Fig. S11.....                                                                                                                                     | 10 |
| XVI.   | The $\Delta G$ , Mulliken charge of Ga, and Mulliken charge of cage for $Ga@I_h(1812)-C_{60}$ using different functionalized radicals with and without toluene solvent on B3LYP/6-31G*~LanI2dz in Table S6.....                                                   | 11 |
| XVII.  | Natural electron populations of Ga and F atoms for F-functionalized $Ga@I_h(1812)-C_{60}$ on different calculation levels in Table S7.....                                                                                                                        | 11 |
| XVIII. | The geometries of energetically optimal $Ga@C_{2n}$ ( $2n = 28, 36, 44, 50, 60,$ and $70$ ) isomers on B3LYP/6-31G*~LanI2dz in Fig. S12.....                                                                                                                      | 11 |
| XIX.   | Relative energy of partial important $C_{2n}^{m-}$ ( $m = 1 - 3$ ) isomers on AM1 method and their corresponding optimized $Ga@C_{2n}$ isomers on B3LYP/6-31G*~LanI2dz in Table S8 - S13.....                                                                     | 12 |
| XX.    | Cartesian coordinate of $Ga@I_h(1812)-C_{80}$ .....                                                                                                                                                                                                               | 14 |
| XXI.   | The movement of Ga in $I_h(1812)-C_{80}$ cage in S1.avi and the details for ab initio molecular dynamic calculation.....                                                                                                                                          | 16 |
| XXII.  | The movement of Ga in F-functionalized $I_h(1812)-C_{80}$ cage in S2.avi.....                                                                                                                                                                                     | 16 |

- I. Relative energy of partial important  $C_{60}^{m-}$  ( $m = 1 - 3$ ) isomers on AM1 method in Table S1.

**Table S1** Relative energy ( $\Delta E$ , in kcal·mol<sup>-1</sup>) of  $C_{60}^{m-}$  ( $m = 1 - 3$ ) isomers on AM1.

| Isomer                | PA | $C_{60}^-$ | $C_{60}^{2-}$ | $C_{60}^{3-}$ |
|-----------------------|----|------------|---------------|---------------|
| $I_h(1812)-C_{60}$    | 0  | 0.0        | 0.0           | 0.0           |
| $C_{2v}(1809)-C_{60}$ | 2  | 21.5       | 16.4          | 19.3          |
| $C_2(1789)-C_{60}$    | 3  | 33.3       | 31.1          | 30.2          |
| $D_3(1803)-C_{60}$    | 3  | 38.7       | 45.0          | 29.8          |
| $C_s(1804)-C_{60}$    | 3  | 50.2       | 41.5          | 31.4          |

- II. Relative energy and gap of  $Ga@C_{60}$  isomers on B3LYP/6-31G\*~Lan12dz in Table S2.

**Table S2** Relative energy ( $\Delta E$ ), *gap* from  $\beta$  orbitals, and spin contamination ( $\hat{S}^2$ ) of  $Ga@C_{60}$  isomers, in which different numbers of Ga position for  $Ga@I_h(1812)-C_{60}$  correspond to the numbers of metal position in Fig. S4.

| Isomer                   | PA | Ga Position | Spin state | $\Delta E(\text{kcal}\cdot\text{mol}^{-1})$ | $\Delta E(\text{kJ}\cdot\text{mol}^{-1})$ | <i>gap</i> (eV) | $\hat{S}^2$ |
|--------------------------|----|-------------|------------|---------------------------------------------|-------------------------------------------|-----------------|-------------|
| $Ga@I_h(1812)-C_{60}$    | 0  | 5           | Doublet    | 0.00                                        | 0                                         | 2.57            | 0.76        |
|                          |    | 5           | Quartet    | 38.57                                       | 161                                       | 0.92            | 3.76        |
|                          |    | 6           | Doublet    | 0.02                                        | 0                                         | 2.57            | 0.76        |
|                          |    | 1           | Doublet    | 0.02                                        | 0                                         | 2.57            | 0.76        |
|                          |    | 3           | Doublet    | 0.04                                        | 0                                         | 2.59            | 0.76        |
|                          |    | 2           | Doublet    | 0.04                                        | 0                                         | 2.56            | 0.76        |
|                          |    | 4           | Doublet    | 0.07                                        | 0                                         | 2.56            | 0.76        |
| $Ga@C_{2v}(1809)-C_{60}$ | 2  | /           | Doublet    | 24.43                                       | 102                                       | 1.78            | 0.76        |
|                          |    | /           | Quartet    | 56.19                                       | 235                                       | 1.03            | 3.76        |
| $Ga@C_2(1789)-C_{60}$    | 3  | /           | Doublet    | 46.52                                       | 195                                       | 1.12            | 0.78        |
| $Ga@C_s(1804)-C_{60}$    | 3  | /           | Doublet    | 44.10                                       | 185                                       | 1.90            | 0.76        |
| $Ga@D_3(1803)-C_{60}$    | 3  | /           | Doublet    | 46.36                                       | 194                                       | 1.89            | 0.76        |

- III. Relative energy of doublet  $Ga@C_{60}$  isomers on B3LYP/6-31G\*, B3LYP/6-31G\*~SDD, PBE0/6-31G\*~SDD, and BP86/6-31G\*~SDD in Table S3.

**Table S3** Relative energy ( $\Delta E$ , in kcal·mol<sup>-1</sup>) of doublet  $Ga@C_{60}$  isomers on B3LYP/6-31G\*, B3LYP/6-31G\*~SDD, PBE0/6-31G\*~SDD, and BP86/6-31G\*~SDD.

| Isomer                                    | Spin state | B3LYP/6-31G* | BP86/6-31G*<br>~SDD | B3LYP/6-31G*<br>~SDD | PBE0/6-31G*<br>~SDD |
|-------------------------------------------|------------|--------------|---------------------|----------------------|---------------------|
| Ga@I <sub>h</sub> (1812)-C <sub>60</sub>  | Doublet    | 0.0          | 0.0                 | 0.0                  | 0.0                 |
| Ga@C <sub>2v</sub> (1809)-C <sub>60</sub> | Doublet    | 18.8         | 22.9                | 24.4                 | 5.5                 |
| Ga@C <sub>s</sub> (1804)-C <sub>60</sub>  | Doublet    | 38.2         | 61.1                | 63.6                 | 44.7                |
| Ga@D <sub>3</sub> (1803)-C <sub>60</sub>  | Doublet    | 39.2         | 42.8                | 46.5                 | 28.2                |
| Ga@C <sub>2</sub> (1789)-C <sub>60</sub>  | Doublet    | 41.2         | 42.9                | 46.5                 | 46.7                |

**Note:** Except for 6-31G\* basis set is for all of Ga and C atoms on B3LYP/6-31G\*, 6-31G\* basis set is only for C atoms and SDD basis set is for Ga atoms on B3LYP/6-31G\*~SDD, PBE0/6-31G\*~SDD, and BP86/6-31G\*~SDD.

IV. Geometry of optimized Ga@C<sub>2v</sub>(1809)-C<sub>60</sub> on B3LYP/6-31G\*~Lan12dz in Fig. S1.

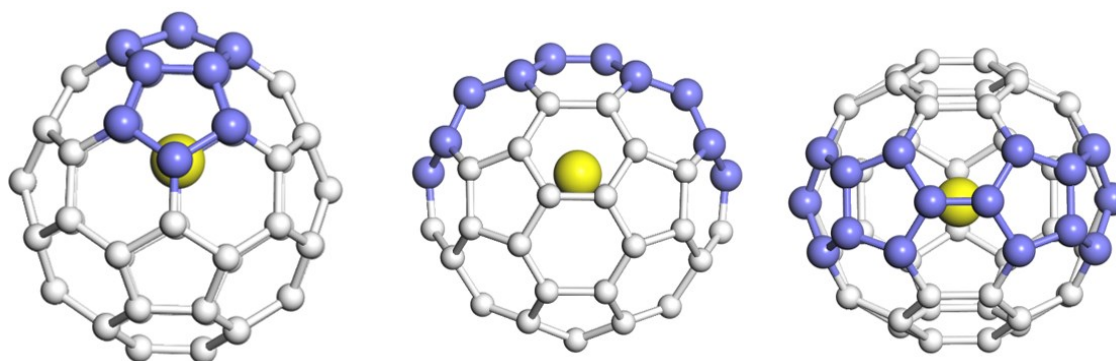

**Fig. S1.** Geometry from three perpendicular angles for optimized Ga@C<sub>2v</sub>(1809)-C<sub>60</sub>. (The C of PA fragment and Ga is marked in violet and yellow, respectively.)

V. Statistical thermodynamic analysis of Ga@C<sub>60</sub> isomers on B3LYP/6-31G\*~Lan12dz in Fig. S2.

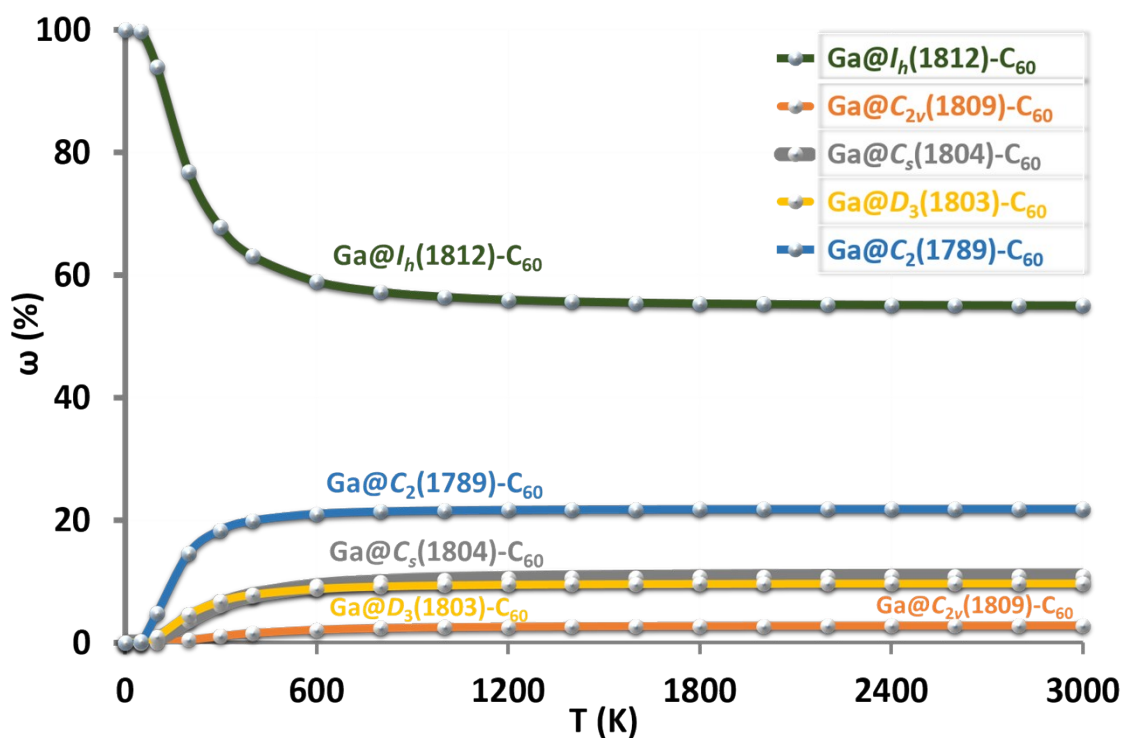

**Fig. S2.** Statistical thermodynamic analysis of Ga@C<sub>60</sub> isomers on B3LYP/6-31G\*~LanL2dz.

VI. Schematic electronic structure analysis on Ga<sup>m+</sup>@C<sub>2n</sub><sup>m-</sup> (n = 14, 18, 22, 25, 30, and 35; m = 0 - 3) in Fig. S3.

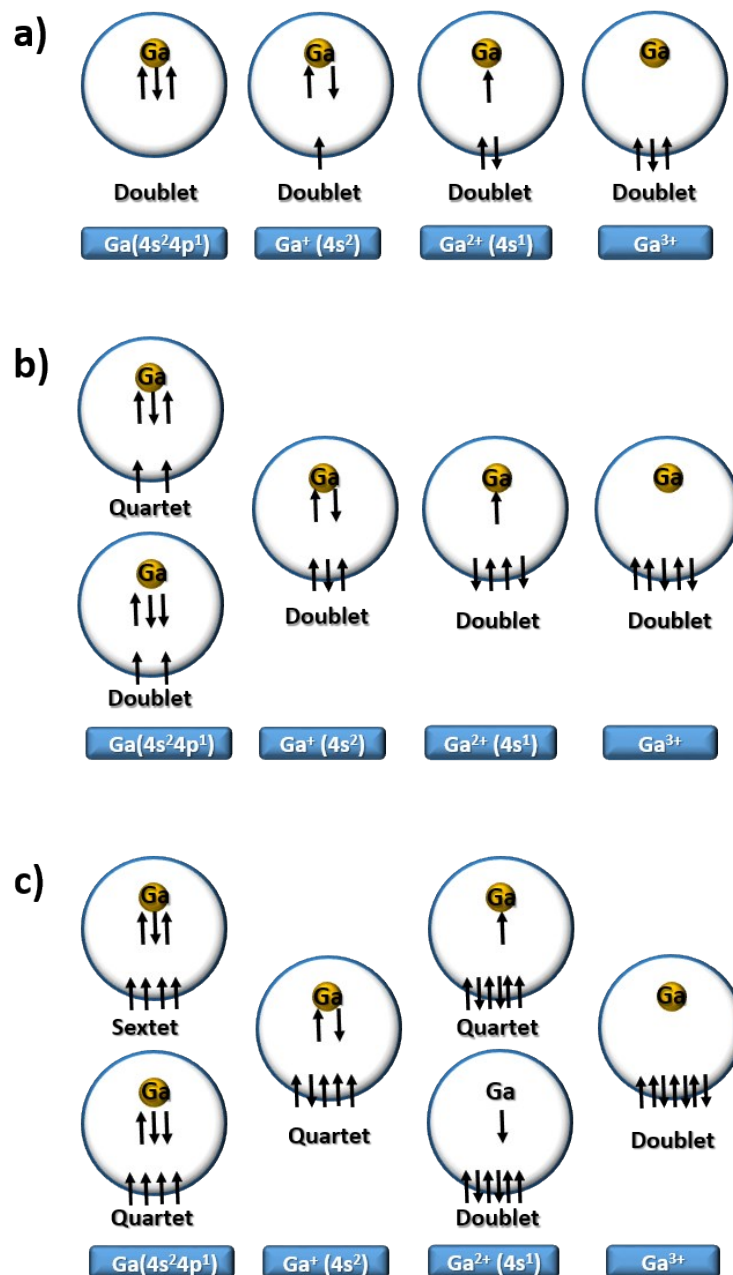

**Fig. S3.** Schematic electronic structure analysis of a) Ga@D<sub>2d</sub>(14)-C<sub>36</sub>, Ga@D<sub>2</sub>(75)-C<sub>44</sub>, Ga@D<sub>2</sub>(89)-C<sub>44</sub>, Ga@D<sub>5h</sub>(271)-C<sub>50</sub>, **Ga@I<sub>h</sub>(1812)-C<sub>60</sub>**, and Ga@D<sub>5h</sub>(8149)-C<sub>70</sub> (the ground states are singlet for the corresponding empty cages on B3LYP/6-31G\*), b) Ga@D<sub>6h</sub>(15)-C<sub>36</sub> (the ground state is triplet for D<sub>6h</sub>(15)-C<sub>36</sub> on B3LYP/6-31G\*), and c) Ga@T<sub>d</sub>(2)-C<sub>28</sub> (the ground state is quintet for T<sub>d</sub>(2)-C<sub>28</sub> on B3LYP/6-31G\*).

VII. Different positions of Ga inside I<sub>h</sub>(1812)-C<sub>60</sub> in Fig. S4.

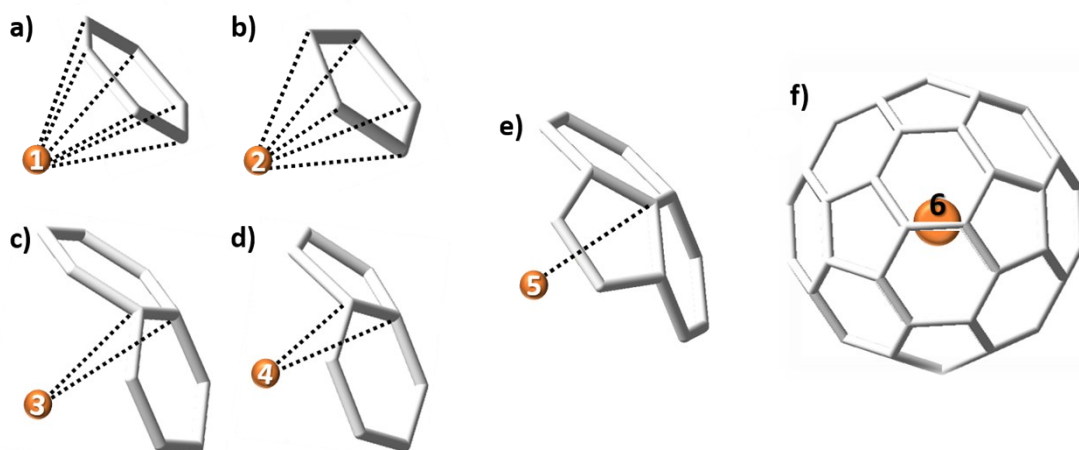

**Fig. S4.** Schematic diagram of different Ga positions inside  $I_h(1812)$ - $C_{60}$ . (a) the center of hexagon, (b) the center of pentagon, (c) the center of the bond between two hexagons, (d) the center of the bond between hexagon and pentagon, (e) the vertex between one pentagon and two hexagons, and (f) the center of cage.

VIII. The RMSD of  $Ga@I_h(1812)$ - $C_{60}$  and F-functionalized  $Ga@I_h(1812)$ - $C_{60}$  in Fig. S5.

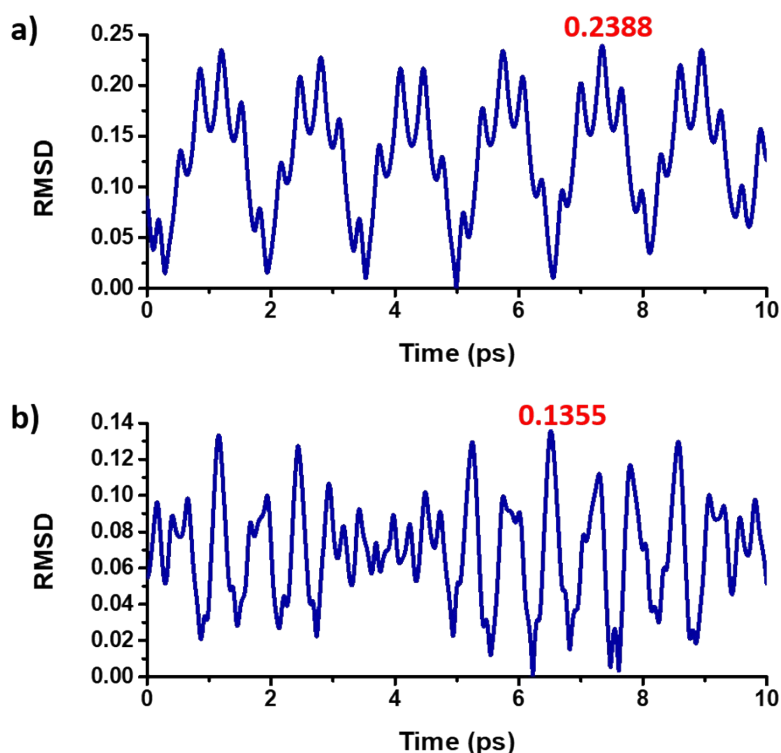

**Fig. S5.** The RMSD of a)  $Ga@I_h(1812)$ - $C_{60}$  and b) F-functionalized  $Ga@I_h(1812)$ - $C_{60}$ . (The minimum RMSD value are 0, and the maximum RMSD value are given in red.)

IX. Natural electron populations of Ga atoms for energetically optimal  $Ga@C_{2n}$  ( $2n = 28, 36, 44, 50, 60,$  and  $70$ ) with their ground states and Al atoms for doublet  $Al@C_{2n}$  ( $2n = 28$  and  $60$ ) on different theoretical levels in Table S4 – S5.

**Table S4** Natural electron populations of Ga for doublet Ga@C<sub>2n</sub> (2n = 28, 36, 44, 50, 60, and 70) and Al for doublet Al@C<sub>2n</sub> (2n = 28 and 60) on B3LYP/6-311G(d,p)~Lanl2dz.

| Isomer                                    | $\alpha$ -orbital population                                                | $\beta$ -orbital population                                                 |
|-------------------------------------------|-----------------------------------------------------------------------------|-----------------------------------------------------------------------------|
| Ga@T <sub>d</sub> (2)-C <sub>28</sub>     | 4s <sup>0.26</sup> 4p <sup>0.04</sup> 5p <sup>0.36</sup>                    | 4s <sup>0.29</sup> 4p <sup>0.04</sup> 5p <sup>0.36</sup>                    |
| Al@T <sub>d</sub> (2)-C <sub>28</sub>     | 3s <sup>0.06</sup> 3p <sup>0.04</sup> 4s <sup>0.09</sup> 4p <sup>0.33</sup> | 3s <sup>0.04</sup> 3p <sup>0.04</sup> 4s <sup>0.07</sup> 4p <sup>0.33</sup> |
| Ga@D <sub>6h</sub> (15)-C <sub>36</sub>   | 4s <sup>0.98</sup> 4p <sup>0.24</sup> 5p <sup>0.10</sup>                    | 4s <sup>0.98</sup> 4p <sup>0.24</sup> 5p <sup>0.10</sup>                    |
| Ga@D <sub>2d</sub> (14)-C <sub>36</sub>   | 4s <sup>0.98</sup> 4p <sup>0.13</sup> 5p <sup>0.22</sup>                    | 4s <sup>0.99</sup> 4p <sup>0.13</sup> 5p <sup>0.22</sup>                    |
| Ga@D <sub>2</sub> (75)-C <sub>44</sub>    | 4s <sup>0.99</sup> 4p <sup>0.16</sup> 5p <sup>0.07</sup>                    | 4s <sup>0.99</sup> 4p <sup>0.16</sup> 5p <sup>0.07</sup>                    |
| Ga@D <sub>2</sub> (89)-C <sub>44</sub>    | 4s <sup>0.99</sup> 4p <sup>0.16</sup> 5p <sup>0.07</sup>                    | 4s <sup>0.99</sup> 4p <sup>0.16</sup> 5p <sup>0.07</sup>                    |
| Ga@D <sub>5h</sub> (271)-C <sub>50</sub>  | 4s <sup>1.00</sup> 4p <sup>0.14</sup> 5p <sup>0.02</sup>                    | 4s <sup>0.99</sup> 4p <sup>0.14</sup> 5p <sup>0.02</sup>                    |
| Ga@I <sub>h</sub> (1812)-C <sub>60</sub>  | 4s <sup>0.99</sup> 4p <sup>0.09</sup> 5p <sup>0.02</sup>                    | 4s <sup>0.99</sup> 4p <sup>0.09</sup> 5p <sup>0.02</sup>                    |
| Al@I <sub>h</sub> (1812)-C <sub>60</sub>  | 3s <sup>0.99</sup> 3p <sup>0.09</sup> 4p <sup>0.02</sup>                    | 3s <sup>0.99</sup> 3p <sup>0.09</sup> 4p <sup>0.02</sup>                    |
| Ga@D <sub>5h</sub> (8149)-C <sub>70</sub> | 4s <sup>0.99</sup> 4p <sup>0.07</sup> 5p <sup>0.02</sup>                    | 4s <sup>0.99</sup> 4p <sup>0.07</sup> 5p <sup>0.02</sup>                    |

**Table S5** Natural electron populations of Ga for doublet Ga@C<sub>2n</sub> (2n = 28, 36, 44, 50, 60, and 70) on PBE0/6-311G(d,p)~SDD and B3LYP/6-31G\*.

| Isomer                                    | <sup>a</sup> PBE0/6-311G(d,p)~SDD                                           |                                                                             | <sup>b</sup> B3LYP/6-31G*                                                                      |                                                                                                |
|-------------------------------------------|-----------------------------------------------------------------------------|-----------------------------------------------------------------------------|------------------------------------------------------------------------------------------------|------------------------------------------------------------------------------------------------|
|                                           | $\alpha$ -orbital population                                                | $\beta$ -orbital population                                                 | $\alpha$ -orbital population                                                                   | $\beta$ -orbital population                                                                    |
| Ga@T <sub>d</sub> (2)-C <sub>28</sub>     | 4s <sup>0.24</sup> 4p <sup>0.04</sup> 5s <sup>0.03</sup> 5p <sup>0.28</sup> | 4s <sup>0.37</sup> 4p <sup>0.04</sup> 5s <sup>0.03</sup> 5p <sup>0.28</sup> | 4s <sup>0.25</sup> 4p <sup>0.38</sup> 4d <sup>0.01</sup> 5s <sup>0.03</sup> 8s <sup>0.15</sup> | 4s <sup>0.30</sup> 4p <sup>0.38</sup> 4d <sup>0.01</sup> 5s <sup>0.03</sup> 8s <sup>0.15</sup> |
| Ga@D <sub>6h</sub> (15)-C <sub>36</sub>   | 4s <sup>0.98</sup> 4p <sup>0.22</sup> 5p <sup>0.10</sup>                    | 4s <sup>0.99</sup> 4p <sup>0.22</sup> 5p <sup>0.10</sup>                    | 4s <sup>0.99</sup> 4p <sup>0.31</sup> 4d <sup>0.01</sup> 5s <sup>0.01</sup> 5p <sup>0.02</sup> | 4s <sup>0.99</sup> 4p <sup>0.31</sup> 4d <sup>0.01</sup> 5s <sup>0.01</sup> 5p <sup>0.02</sup> |
| Ga@D <sub>2d</sub> (14)-C <sub>36</sub>   | 4s <sup>0.98</sup> 4p <sup>0.32</sup> 5p <sup>0.02</sup>                    | 4s <sup>0.99</sup> 4p <sup>0.32</sup> 5p <sup>0.02</sup>                    | 4s <sup>0.99</sup> 4p <sup>0.31</sup> 4d <sup>0.01</sup> 5s <sup>0.01</sup> 5p <sup>0.02</sup> | 4s <sup>0.99</sup> 4p <sup>0.31</sup> 4d <sup>0.01</sup> 5s <sup>0.01</sup> 5p <sup>0.02</sup> |
| Ga@D <sub>2</sub> (75)-C <sub>44</sub>    | 4s <sup>0.99</sup> 4p <sup>0.18</sup> 5p <sup>0.07</sup>                    | 4s <sup>0.99</sup> 4p <sup>0.18</sup> 5p <sup>0.07</sup>                    | 4s <sup>1.00</sup> 4p <sup>0.20</sup> 5s <sup>0.01</sup> 5p <sup>0.02</sup>                    | 4s <sup>0.99</sup> 4p <sup>0.20</sup> 5s <sup>0.01</sup> 5p <sup>0.02</sup>                    |
| Ga@D <sub>2</sub> (89)-C <sub>44</sub>    | 4s <sup>0.99</sup> 4p <sup>0.23</sup> 5p <sup>0.02</sup>                    | 4s <sup>0.99</sup> 4p <sup>0.23</sup> 5p <sup>0.02</sup>                    | 4s <sup>1.00</sup> 4p <sup>0.19</sup> 5s <sup>0.01</sup> 5p <sup>0.02</sup>                    | 4s <sup>1.00</sup> 4p <sup>0.19</sup> 5s <sup>0.01</sup> 5p <sup>0.02</sup>                    |
| Ga@D <sub>5h</sub> (271)-C <sub>50</sub>  | 4s <sup>0.99</sup> 4p <sup>0.16</sup> 5p <sup>0.02</sup>                    | 4s <sup>0.99</sup> 4p <sup>0.16</sup> 5p <sup>0.02</sup>                    | 4s <sup>1.00</sup> 4p <sup>0.13</sup> 5p <sup>0.02</sup> 6s <sup>0.01</sup>                    | 4s <sup>1.00</sup> 4p <sup>0.13</sup> 5p <sup>0.02</sup> 6s <sup>0.01</sup>                    |
| Ga@I <sub>h</sub> (1812)-C <sub>60</sub>  | 4s <sup>0.99</sup> 4p <sup>0.10</sup> 5p <sup>0.02</sup>                    | 4s <sup>0.99</sup> 4p <sup>0.10</sup> 5p <sup>0.02</sup>                    | 4s <sup>0.99</sup> 4p <sup>0.09</sup> 5s <sup>0.01</sup> 5p <sup>0.01</sup>                    | 4s <sup>0.99</sup> 4p <sup>0.09</sup> 5s <sup>0.01</sup> 5p <sup>0.01</sup>                    |
| Ga@D <sub>5h</sub> (8149)-C <sub>70</sub> | 4s <sup>0.99</sup> 4p <sup>0.07</sup> 5p <sup>0.02</sup>                    | 4s <sup>0.99</sup> 4p <sup>0.07</sup> 5p <sup>0.02</sup>                    | 4s <sup>0.99</sup> 4p <sup>0.08</sup> 5p <sup>0.02</sup>                                       | 4s <sup>0.99</sup> 4p <sup>0.08</sup> 5p <sup>0.02</sup>                                       |

<sup>a</sup>6-311G(d,p) basis set is for C atoms, and SDD basis set is for Ga atoms on PBE0/6-311G(d,p)~SDD.

<sup>b</sup>6-31G\* basis set is for all of Ga and C atoms on B3LYP/6-31G\*.

X. Interplay diagram from  $\beta$  orbitals of C<sub>60</sub>, Ga, and Ga@I<sub>h</sub>(1812)-C<sub>60</sub> in Fig. S6.

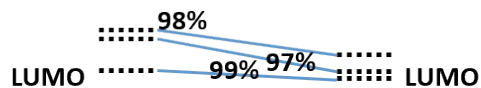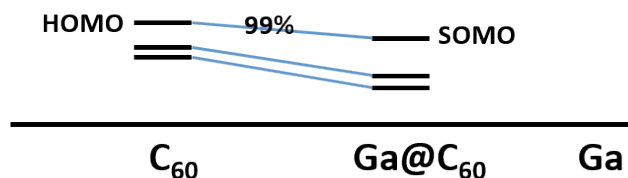

**Fig. S6.** Interplay diagram from  $\beta$  orbitals of  $C_{60}$ , Ga, and  $Ga@I_h(1812)-C_{60}$ .

XI. Spin density map for doublet  $Ga@I_h(1812)-C_{60}$  on B3LYP/6-31G\*~LanI2dz in Fig. S7.

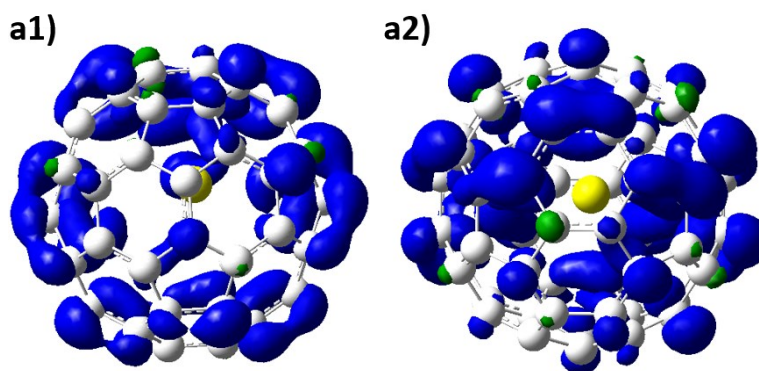

**Fig. S7.** a1) side view and a2) top view of spin density map of doublet  $Ga@I_h(1812)-C_{60}$ . (Isovalue = 0.001)

XII. The topology result of BCPs for  $Ga@I_h(1812)-C_{60}$ , and parameters related to the especial BCP in Fig. S8.

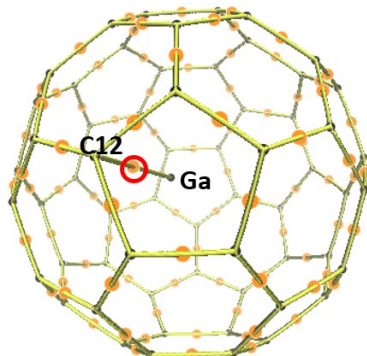

$$\begin{aligned}
 \text{MBO} &= 0.03 \\
 \text{WBO} &= 0.07 \\
 \rho_{BCP} &= 0.0185 \\
 \nabla^2 \rho_{BCP} &= 0.0460 \\
 H_{BCP} &= -0.0003 \\
 |V_{BCP}|/G_{BCP} &= 1.0286
 \end{aligned}$$

**Fig. S8.** BCPs and bond paths in  $Ga@I_h(1812)-C_{60}$ . Black balls, orange balls, and yellow sticks represent atoms, BCPs, and BCP paths, respectively. The especial BCP is enclosed by red circle for Ga-C12 in  $Ga@I_h(1812)-C_{60}$ . (MBO is Mayer bond order,



WBO is Wiberg bond order,  $\rho_{BCP}$  is the density of all electrons,  $\nabla^2\rho_{BCP}$  is the Laplacian of the electron density,  $H_{BCP}$  is the energy density,  $|V_{BCP}|/G_{BCP}$  is the potential energy density to the Lagrangian kinetic energy.)

XIII. ELF map between two C atoms closest to Ga and Ga for Ga@ $I_h(1812)$ -C<sub>60</sub> in Fig. S9.

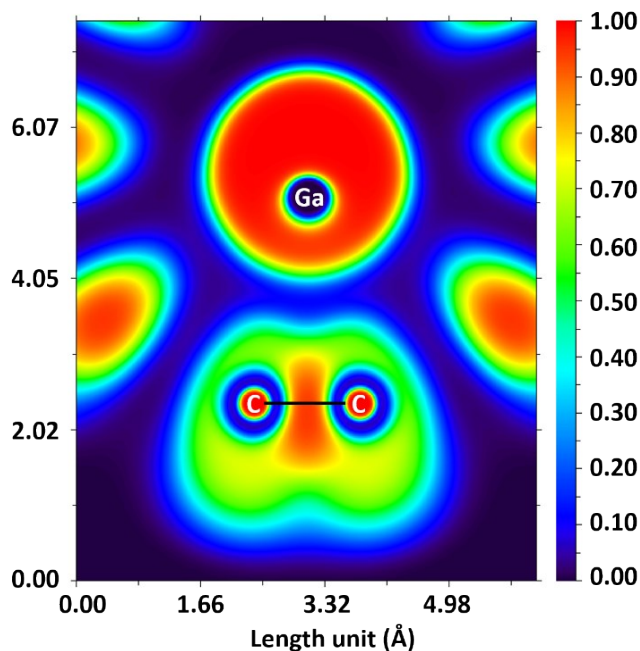

**Fig. S9.** The ELF map between Ga and two C atoms closest to Ga of Ga@ $I_h(1812)$ -C<sub>60</sub>.

XIV. H-functionalized Ga@ $I_h(1812)$ -C<sub>60</sub> with different reaction sites of H on B3LYP/6-31G\*~Lan12dz in Fig. S10.

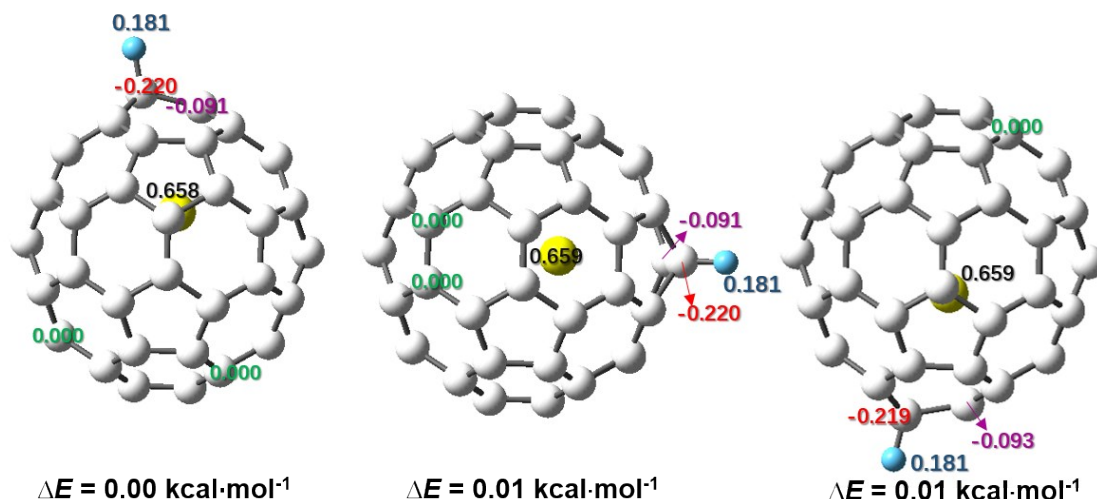

**Fig. S10.** The relative energy ( $\Delta E$ ) and Mulliken charge for Ga@ $I_h(1812)$ -C<sub>60</sub> with three different reaction sites of H. (The Mulliken charge is marked in black for Ga, the Mulliken charge is marked in blue for H, the Mulliken charge is marked in red for C bonded by H, the Mulliken charge is marked in purple for C of the second negative

charge, and the Mulliken charge is marked in green for C of the least negative charge.)

XV. Optimized geometries of Ga@I<sub>h</sub>(1812)-C<sub>60</sub> with different functionalized groups on the same reaction site in Fig. S11.

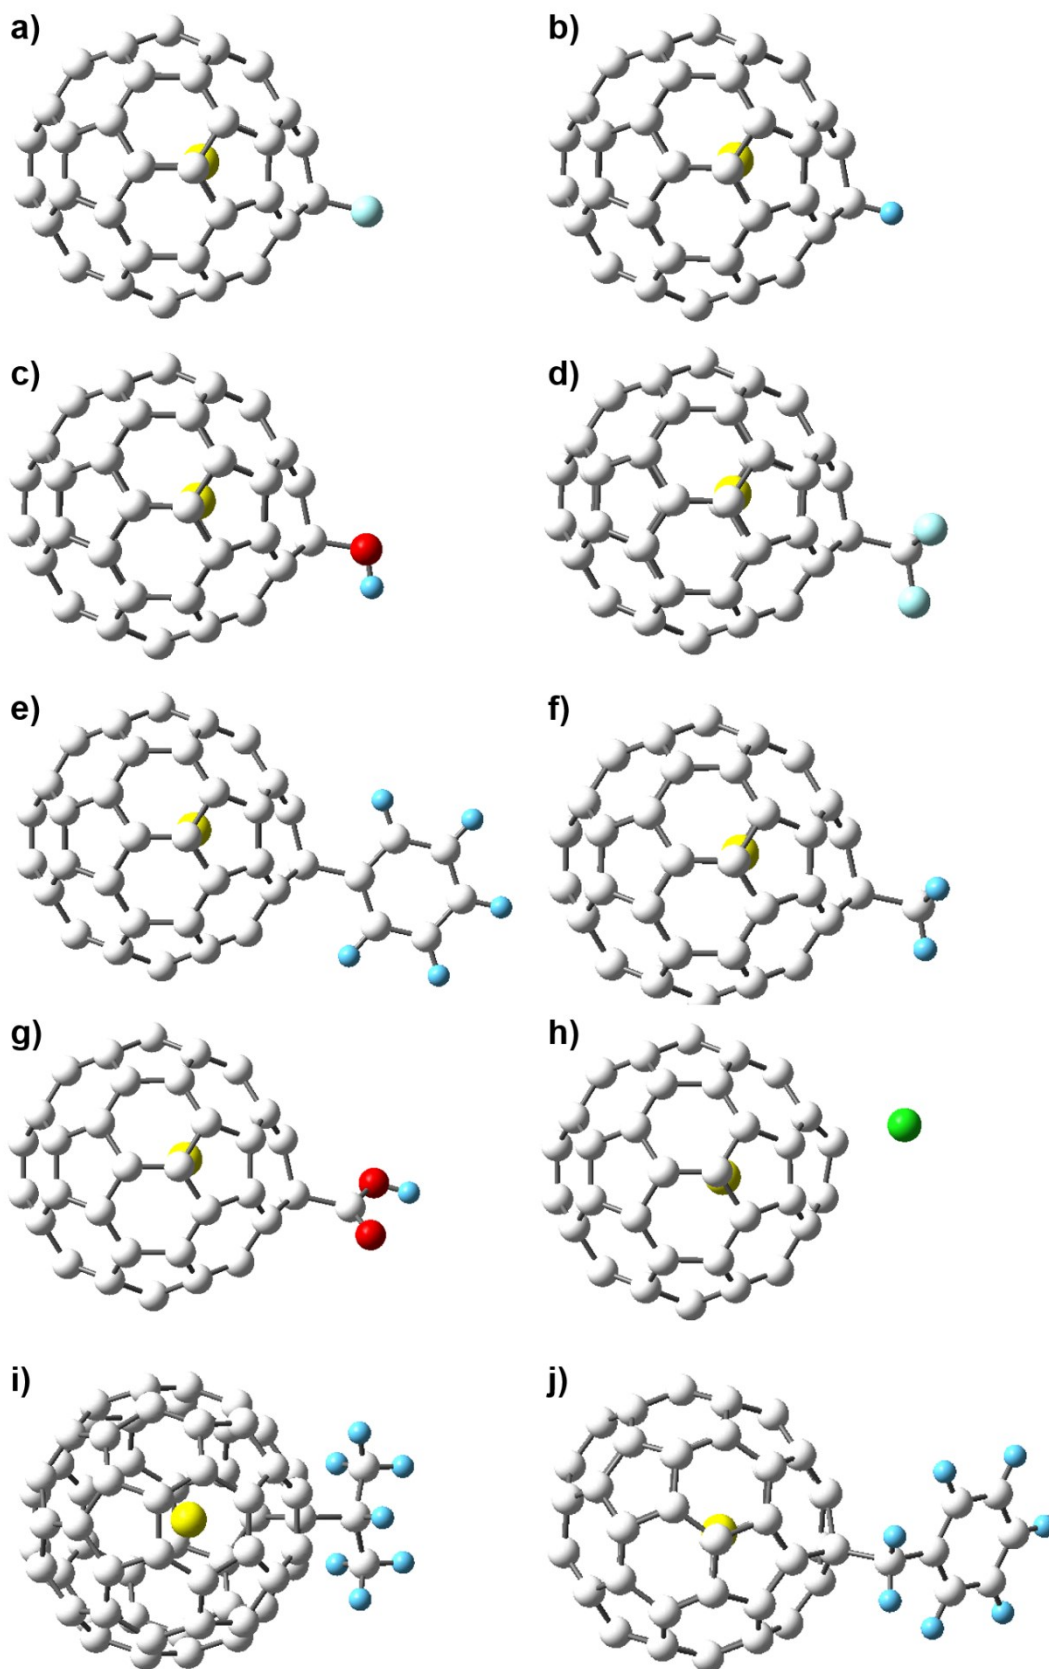

**Fig. S11.** Optimized geometries of  $\text{Ga}@I_h(1812)\text{-C}_{60}$  with different functionalized radicals a) F, b) H, c) OH, d)  $\text{CF}_3$ , e)  $\text{C}_6\text{H}_5$ , f)  $\text{CH}_3$ , g)  $\text{COOH}$ , h) Cl, i)  $\text{CH}(\text{CH}_3)_2$ , and j)  $\text{CH}_2\text{C}_6\text{H}_5$  on the same reaction site.

XVI. The  $\Delta G$ , Mulliken charge of Ga, and Mulliken charge of cage for  $\text{Ga}@I_h(1812)\text{-C}_{60}$  using different functionalized radicals with and without toluene solvent on B3LYP/6-31G\*~Lan12dz in Table S6.

**Table S6** The  $\Delta G$  (kcal·mol<sup>-1</sup>), Mulliken charge of Ga, and Mulliken charge of cage for  $\text{Ga}@I_h(1812)\text{-C}_{60}$  using different functionalized groups with and without toluene solvent.

| Radical                                       | Without solvent |                       |                         | With toluene solvent |                       |                         |
|-----------------------------------------------|-----------------|-----------------------|-------------------------|----------------------|-----------------------|-------------------------|
|                                               | $\Delta G$      | Mulliken charge of Ga | Mulliken charge of cage | $\Delta G$           | Mulliken charge of Ga | Mulliken charge of cage |
| /                                             | /               | 0.740                 | -0.740                  | /                    | 0.740                 | -0.740                  |
| H                                             | -48.8           | 0.658                 | -0.839                  | -49.1                | 0.658                 | -0.847                  |
| CF <sub>3</sub>                               | -38.4           | 0.661                 | -0.755                  | -38.5                | 0.662                 | -0.747                  |
| CH <sub>2</sub> C <sub>6</sub> H <sub>5</sub> | -15.2           | 0.656                 | -0.697                  | -15.1                | 0.656                 | -0.702                  |
| Cl                                            | -28.3           | 0.655                 | -0.535                  | -29.3                | 0.657                 | -0.457                  |
| F                                             | -63.5           | 0.657                 | -0.303                  | -63.9                | 0.660                 | -0.295                  |
| CH <sub>3</sub>                               | -31.2           | 0.659                 | -0.699                  | -31.3                | 0.658                 | -0.705                  |
| C <sub>6</sub> H <sub>5</sub>                 | -36.3           | 0.655                 | -0.777                  | -36.4                | 0.656                 | -0.775                  |
| OH                                            | -39.7           | 0.656                 | -0.421                  | -39.6                | 0.657                 | -0.417                  |
| COOH                                          | -29.1           | 0.660                 | -0.688                  | -28.8                | 0.660                 | -0.687                  |
| CH <sub>3</sub> CHCH <sub>3</sub>             | -21.0           | 0.659                 | -0.717                  | -21.2                | 0.658                 | -0.722                  |

XVII. Natural electron populations of Ga and F atoms for F-functionalized  $\text{Ga}@I_h(1812)\text{-C}_{60}$  on different calculation levels in Table S7.

**Table S7** Natural electron populations of Ga and F for F-functionalized  $\text{Ga}@I_h(1812)\text{-C}_{60}$  on B3LYP/6-311G(d,p)~Lan12dz, PBE0/6-311G(d,p)~SDD, and B3LYP/6-31G\*.

| Atom | B3LYP/6-311G(d,p)~Lan12dz                                | PBE0/6-311G(d,p)~SDD                                     | B3LYP/6-31G*                                                                |
|------|----------------------------------------------------------|----------------------------------------------------------|-----------------------------------------------------------------------------|
| Ga   | 4s <sup>1.97</sup> 4p <sup>0.21</sup> 5p <sup>0.05</sup> | 4s <sup>1.98</sup> 4p <sup>0.22</sup> 5p <sup>0.06</sup> | 4s <sup>1.98</sup> 4p <sup>0.22</sup> 5s <sup>0.01</sup> 5p <sup>0.05</sup> |
| F    | 2s <sup>1.84</sup> 2p <sup>5.55</sup>                    | 2s <sup>1.84</sup> 2p <sup>5.54</sup>                    | 2s <sup>1.84</sup> 2p <sup>5.53</sup>                                       |

XVIII. The geometries of energetically optimal  $\text{Ga}@C_{2n}$  (2n = 28, 36, 44, 50, 60, and 70) isomers on B3LYP/6-311G\*~Lan12dz in Fig. S12.

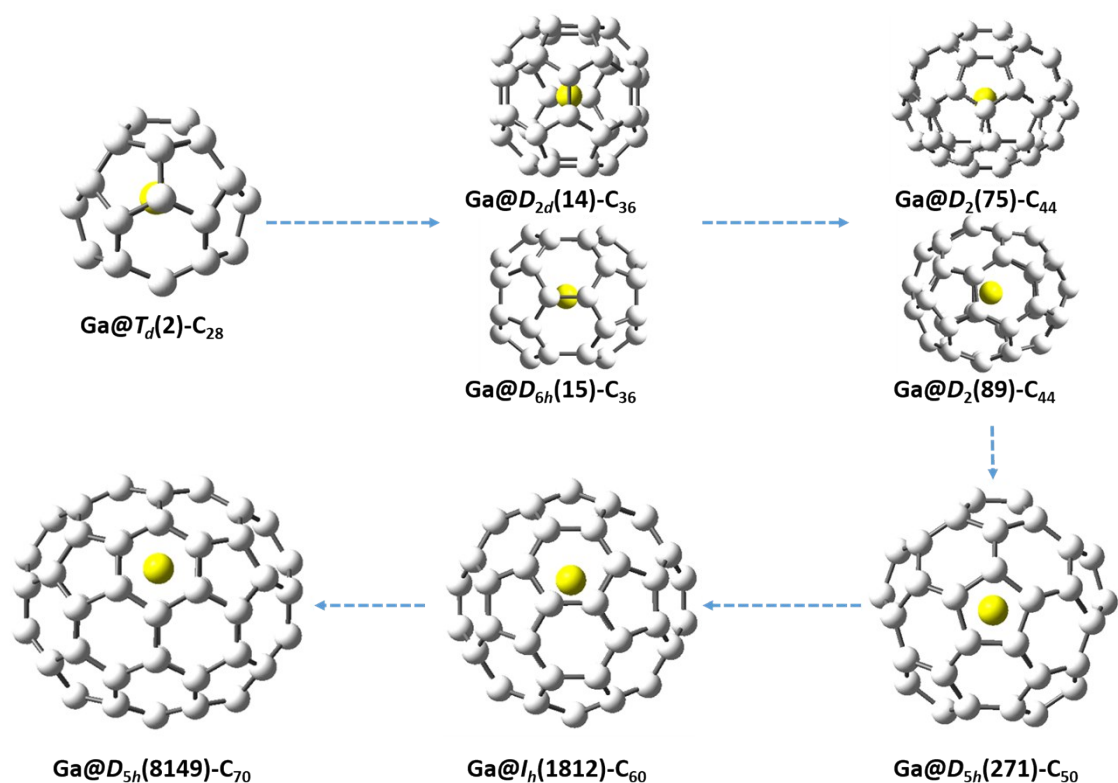

**Fig. S12.** The geometries of energetically optimal  $\text{Ga}@C_{2n}$  ( $2n = 28, 36, 44, 50, 60,$  and  $70$ ) isomers.

XIX. Relative energy of partial important  $C_{2n}^{m-}$  ( $m = 1 - 3$ ) isomers on AM1 method and their corresponding optimized  $\text{Ga}@C_{2n}$  isomers on B3LYP/6-31G\*~Lan12dz in Table S8 - S13.

**Table S8** Relative energy ( $\text{kcal}\cdot\text{mol}^{-1}$ ) of  $C_{28}^{m-}$  ( $m = 1 - 3$ ) isomers and their corresponding  $\text{Ga}@C_{28}$  isomers.

| Isomer          | Spin state | $\text{Ga}@C_{28}$ | $C_{28}^{-}$ | $C_{28}^{2-}$ | $C_{28}^{3-}$ |
|-----------------|------------|--------------------|--------------|---------------|---------------|
| $T_d(2)-C_{28}$ | Doublet    | <b>0</b>           | <b>0</b>     | <b>0</b>      | <b>0</b>      |
|                 | Quartet    | 16.0               | /            | /             | /             |
| $D_2(1)-C_{28}$ | Doublet    | 26.7               | 50.2         | 24.7          | 37.8          |

**Table S9** Relative energy ( $\text{kcal}\cdot\text{mol}^{-1}$ ) of  $C_{36}^{m-}$  ( $m = 1 - 3$ ) isomers and their corresponding  $\text{Ga}@C_{36}$  isomers.

| Isomer              | Spin state | $\text{Ga}@C_{36}$ | $C_{36}^{-}$ | $C_{36}^{2-}$ | $C_{36}^{3-}$ |
|---------------------|------------|--------------------|--------------|---------------|---------------|
| $D_{2d}(14)-C_{36}$ | Doublet    | 0.2                | 16.8         | 5.5           | 7.3           |
|                     | Quartet    | <b>0.0</b>         | /            | /             | /             |
| $D_{6h}(15)-C_{36}$ | Doublet    | 0.5                | <b>0.0</b>   | <b>0.0</b>    | <b>0.0</b>    |
|                     | Quartet    | 8.4                | /            | /             | /             |
| $C_2(12)-C_{36}$    | Doublet    | 4.5                | 22.2         | 2.1           | 17.9          |

|                    |         |      |      |      |      |
|--------------------|---------|------|------|------|------|
| $C_{2v}(9)-C_{36}$ | Doublet | 7.1  | 13.0 | 12.5 | 17.4 |
| $C_2(11)-C_{36}$   | Doublet | 14.9 | 30.7 | 4.2  | 14.7 |
| $C_s(8)-C_{36}$    | Doublet | 30.3 | 44.5 | 26.3 | 22.5 |

**Note:** Although the relative energy of doublet  $Ga@D_{2d}(14)-C_{36}$  is 0.2 kcal·mol<sup>-1</sup> greater than that of quartet  $Ga@D_{2d}(14)-C_{36}$ , doublet and quartet  $Ga@D_{2d}(14)-C_{36}$  were nearly isoenergetic. For the isoenergetic doublet and quartet  $Ga@D_{2d}(14)-C_{36}$ , the ground state preferred doublet to quartet for  $Ga@D_{2d}(14)-C_{36}$  from the chemical viewpoint.

**Table S10** Relative energy (kcal·mol<sup>-1</sup>) of  $C_{44}^{m-}$  ( $m = 1 - 3$ ) isomers and their corresponding  $Ga@C_{44}$  isomers.

| Isomer              | Spin state | $Ga@C_{44}$ | $C_{44}^-$ | $C_{44}^{2-}$ | $C_{44}^{3-}$ |
|---------------------|------------|-------------|------------|---------------|---------------|
| $D_2(75)-C_{44}$    | Doublet    | <b>0.0</b>  | <b>0.0</b> | <b>0.0</b>    | <b>0.0</b>    |
|                     | Quartet    | 24.6        | /          | /             | /             |
| $D_2(89)-C_{44}$    | Doublet    | 0.5         | 2.6        | <b>0.0</b>    | 0.6           |
|                     | Quartet    | 23.1        | /          | /             | /             |
| $C_1(88)-C_{44}$    | Doublet    | 26.9        | 12.7       | 17.3          | 15.9          |
| $C_1(69)-C_{44}$    | Doublet    | 15.7        | 13.6       | 9.5           | 12.0          |
| $C_1(52)-C_{44}$    | Doublet    | 19.7        | 15.2       | 12.1          | 11.5          |
| $C_2(87)-C_{44}$    | Doublet    | 32.2        | 15.3       | 20.6          | 12.0          |
| $C_1(78)-C_{44}$    | Doublet    | 28.0        | 15.5       | 17.3          | 12.5          |
| $C_1(77)-C_{44}$    | Doublet    | 25.2        | 17.0       | 16.4          | 13.4          |
| $D_{3h}(72)-C_{44}$ | Doublet    | 11.7        | 22.5       | 0.6           | 15.2          |
| $C_1(67)-C_{44}$    | Doublet    | 50.3        | 25.6       | 44.4          | 30.5          |
| $C_1(57)-C_{44}$    | Doublet    | 47.3        | 29.5       | 37.5          | 27.1          |
| $C_{2v}(55)-C_{44}$ | Doublet    | 22.4        | 41.7       | 8.4           | 18.9          |

**Table S11** Relative energy (kcal·mol<sup>-1</sup>) of  $C_{50}^{m-}$  ( $m = 1 - 3$ ) isomers and their corresponding  $Ga@C_{50}$  isomers.

| Isomer               | Spin state | $Ga@C_{50}$ | $C_{50}^-$ | $C_{50}^{2-}$ | $C_{50}^{3-}$ |
|----------------------|------------|-------------|------------|---------------|---------------|
| $D_{5h}(271)-C_{50}$ | Doublet    | <b>0.0</b>  | 1.3        | <b>0.0</b>    | <b>0.0</b>    |
|                      | Quartet    | 27.7        | /          | /             | /             |
| $D_3(270)-C_{50}$    | Doublet    | 6.2         | 12.7       | 4.3           | 18.8          |
| $C_s(266)-C_{50}$    | Doublet    | 9.2         | <b>0.0</b> | 7.8           | 9.0           |
| $C_2(263)-C_{50}$    | Doublet    | 11.5        | 19.0       | 7.5           | 25.6          |
| $C_s(264)-C_{50}$    | Doublet    | 14.3        | 14.9       | 9.4           | 25.4          |
| $C_2(260)-C_{50}$    | Doublet    | 22.2        | 19.6       | 19.0          | 28.9          |
| $C_s(262)-C_{50}$    | Doublet    | 26.9        | 16.4       | 29.0          | 34.5          |
| $C_2(265)-C_{50}$    | Doublet    | 32.6        | 20.2       | 35.4          | 25.4          |

|                                      |         |      |      |      |      |
|--------------------------------------|---------|------|------|------|------|
| C <sub>1</sub> (268)-C <sub>50</sub> | Doublet | 34.7 | 22.8 | 40.1 | 38.4 |
| C <sub>1</sub> (248)-C <sub>50</sub> | Doublet | 39.4 | 22.2 | 37.9 | 32.6 |

**Table S12** Relative energy (kcal·mol<sup>-1</sup>) of C<sub>70</sub><sup>m-</sup> (m = 1 - 3) isomers and their corresponding Ga@C<sub>70</sub> isomers.

| Isomer                                        | Spin state | Ga@C <sub>70</sub> | C <sub>70</sub> <sup>-</sup> | C <sub>70</sub> <sup>2-</sup> | C <sub>70</sub> <sup>3-</sup> |
|-----------------------------------------------|------------|--------------------|------------------------------|-------------------------------|-------------------------------|
| <i>D</i> <sub>5h</sub> (8149)-C <sub>70</sub> | Doublet    | <b>0.0</b>         | <b>0.0</b>                   | <b>0.0</b>                    | <b>0.0</b>                    |
|                                               | Quartet    | 37.1               | /                            | /                             | /                             |
| C <sub>2</sub> (7892)-C <sub>70</sub>         | Doublet    | 33.4               | 16.1                         | 24.4                          | 24.8                          |
| C <sub>2</sub> (7957)-C <sub>70</sub>         | Doublet    | 42.9               | 23.3                         | 39.2                          | 22.9                          |
| C <sub>1</sub> (8005)-C <sub>70</sub>         | Doublet    | 37.3               | 25.9                         | 35.2                          | 29.0                          |
| C <sub>5</sub> (8111)-C <sub>70</sub>         | Doublet    | 30.5               | 27.1                         | 31.8                          | 31.0                          |
| C <sub>2</sub> (8064)-C <sub>70</sub>         | Doublet    | 33.7               | 27.4                         | 26.2                          | 24.3                          |
| C <sub>1</sub> (7924)-C <sub>70</sub>         | Doublet    | 40.4               | 28.4                         | 31.7                          | 30.3                          |
| C <sub>1</sub> (8042)-C <sub>70</sub>         | Doublet    | 38.1               | 28.6                         | 28.1                          | 34.9                          |
| C <sub>5</sub> (8094)-C <sub>70</sub>         | Doublet    | 22.7               | 30.9                         | 34.7                          | 23.7                          |
| C <sub>5</sub> (7960)-C <sub>70</sub>         | Doublet    | 40.4               | 30.9                         | 35.2                          | 25.3                          |

**Table S13** Relative energy ( $\Delta E$ , in kcal·mol<sup>-1</sup>) of Ga@C<sub>30</sub> isomers on B3LYP/6-31G\*~LanI2dz and natural electron populations of energetically optimal isomer with the ground state on B3LYP/6-311G(d,p)~LanI2dz.

| Isomer                                 | Spin state | $\Delta E$ | $\alpha$ -orbital population                             | $\beta$ -orbital population                              |
|----------------------------------------|------------|------------|----------------------------------------------------------|----------------------------------------------------------|
| Ga@C <sub>2v</sub> (3)-C <sub>30</sub> | Doublet    | 0          | 4s <sup>0.99</sup> 4p <sup>0.04</sup> 5p <sup>0.37</sup> | 4s <sup>0.14</sup> 4p <sup>0.03</sup> 5p <sup>0.37</sup> |
|                                        | Quartet    | 20.6       | /                                                        | /                                                        |
| Ga@C <sub>2v</sub> (2)-C <sub>30</sub> | Doublet    | 30.7       | /                                                        | /                                                        |
| Ga@D <sub>5h</sub> (1)-C <sub>30</sub> | Doublet    | 69.0       | /                                                        | /                                                        |

**Note:** Ga@C<sub>30</sub> as an example was focused to explore whether Ga (II) could be realized. There was indeed two electrons transferred from Ga to C<sub>2v</sub>(3)-C<sub>30</sub> for doublet Ga@C<sub>2v</sub>(3)-C<sub>30</sub> according to the natural electron population on the B3LYP/6-311G(d,p)~LanI2dz.

XX. Cartesian coordinate of Ga@I<sub>h</sub>(1812)-C<sub>80</sub>.

Ga@I<sub>h</sub>(1812)-C<sub>80</sub>

|   |             |             |             |
|---|-------------|-------------|-------------|
| C | 0.54450000  | -3.50000000 | 0.23540000  |
| C | 0.18530000  | -3.35980000 | -1.11690000 |
| C | 1.07230000  | -2.68380000 | -2.03790000 |
| C | 0.25840000  | -1.90860000 | -2.96690000 |
| C | 0.69850000  | -0.65950000 | -3.40950000 |
| C | -0.24710000 | 0.44130000  | -3.51650000 |
| C | 0.44260000  | 1.65430000  | -3.10710000 |

|   |             |             |             |
|---|-------------|-------------|-------------|
| C | -0.23900000 | 2.63470000  | -2.38290000 |
| C | 0.41630000  | 3.30740000  | -1.26600000 |
| C | -0.56740000 | 3.52600000  | -0.23160000 |
| C | -0.20630000 | 3.38380000  | 1.13240000  |
| C | -1.09150000 | 2.70650000  | 2.05130000  |
| C | -0.27290000 | 1.92480000  | 2.98400000  |
| C | -0.71780000 | 0.66960000  | 3.42370000  |
| C | 0.23000000  | -0.43380000 | 3.53350000  |
| C | -0.46190000 | -1.64390000 | 3.12310000  |
| C | 0.21670000  | -2.61750000 | 2.38670000  |
| C | -0.43860000 | -3.28820000 | 1.27330000  |
| C | 1.81230000  | -2.95990000 | 0.69920000  |
| C | 1.61430000  | -2.41940000 | 2.03550000  |
| C | 2.28090000  | -1.25700000 | 2.43000000  |
| C | 1.57420000  | -0.23950000 | 3.19250000  |
| C | 2.03420000  | 1.06170000  | 2.73590000  |
| C | 1.12180000  | 2.12690000  | 2.63610000  |
| C | 1.16160000  | 3.01640000  | 1.48160000  |
| C | 2.10950000  | 2.80630000  | 0.47470000  |
| C | 1.73810000  | 2.95870000  | -0.92940000 |
| C | 2.43990000  | 1.94650000  | -1.68270000 |
| C | 1.81150000  | 1.29980000  | -2.75990000 |
| C | 1.96920000  | -0.12410000 | -2.94900000 |
| C | 2.75280000  | -0.87260000 | -2.05200000 |
| C | 2.29610000  | -2.16630000 | -1.59310000 |
| C | 2.66890000  | -2.30890000 | -0.19060000 |
| C | 3.35860000  | -1.09830000 | 0.21660000  |
| C | 3.17290000  | -0.57980000 | 1.50210000  |
| C | 3.01850000  | 0.85160000  | 1.69330000  |
| C | 3.05850000  | 1.71100000  | 0.58250000  |
| C | 3.25090000  | 1.17040000  | -0.75090000 |
| C | 3.39870000  | -0.20630000 | -0.93380000 |
| C | -1.17850000 | -2.99580000 | -1.46430000 |
| C | -1.13620000 | -2.10760000 | -2.61730000 |
| C | -2.04750000 | -1.05150000 | -2.72400000 |
| C | -1.59050000 | 0.24970000  | -3.18410000 |
| C | -2.30030000 | 1.26660000  | -2.42410000 |
| C | -1.63610000 | 2.43570000  | -2.03480000 |
| C | -1.83380000 | 2.97620000  | -0.69530000 |
| C | -2.69820000 | 2.32400000  | 0.19500000  |
| C | -2.32510000 | 2.18100000  | 1.60570000  |
| C | -2.78310000 | 0.89070000  | 2.06590000  |
| C | -1.99390000 | 0.13510000  | 2.97070000  |
| C | -1.83370000 | -1.28680000 | 2.77550000  |



|    |             |             |             |
|----|-------------|-------------|-------------|
| C  | -2.46260000 | -1.93280000 | 1.69520000  |
| C  | -1.75890000 | -2.94100000 | 0.93850000  |
| C  | -2.13090000 | -2.79260000 | -0.46380000 |
| C  | -3.07900000 | -1.69750000 | -0.57320000 |
| C  | -3.03880000 | -0.83890000 | -1.68470000 |
| C  | -3.19570000 | 0.59000000  | -1.49950000 |
| C  | -3.39110000 | 1.11460000  | -0.21060000 |
| C  | -3.42920000 | 0.22270000  | 0.94230000  |
| C  | -3.27250000 | -1.15530000 | 0.75990000  |
| Ga | -0.34360000 | 0.50510000  | 0.38820000  |

XXI. The movement of Ga in  $I_h(1812)$ -C<sub>80</sub> cage in S1.avi and the details for ab initio molecular dynamic calculation.

Calculation details about *ab Initio* molecular dynamics (AIMD):

Standard AIMD, in which a Verlet algorithm was used to integrate Newton's equations of motion, was performed under microcanonical (NVE) ensemble, with spin polarization obtained on PBE-style generalized gradient approximation (GGA)<sup>1</sup> via VASP program<sup>2-4</sup>. To ensure small enough intermolecular interaction, three-dimensional periodic boundary condition with the minimum intermolecular distance of 15 Å was used. The time step was two femto seconds. Temperature of 1000 K was considered during fullerene-formation temperature region. The default cut-off energy was used for the pseudopotentials (400 eV). Tetragonal lattices (25 Å) were utilized. An automatic k-points mesh (1×1×1) was generated with a Gamma-centered grid. Movie was made by Jmol.

XXII. The movement of Ga in F-functionalized  $I_h(1812)$ -C<sub>80</sub> cage in S2.avi.

### References:

1. J. P. Perdew, K. Burke, M. Ernzerhof, *Phys. Rev. Lett.*, 1996, **77**, 3865.
2. G. Kresse, J. Hafner, *Phys. Rev. B*, 1994, **49**, 14251.
3. G. Kresse, J. Furthmüller, *Phys. Rev. B*, 1996, **54**, 11169.
4. G. Kresse, J. Furthmüller, *Comp. Mater. Sci.*, 1996, **6**, 15.
